# Supplementary material
Source: publisher site journal article supplement (https://www.dovepress.com/article/490130)
Supplement: Supplementary file 1 [file get_supplementary_file.php]

**Supplemental Figure.1** The ROC Curve of CAR,PLR,NLR,IINS and CALLY for overall survival(OS) in the training cohort.


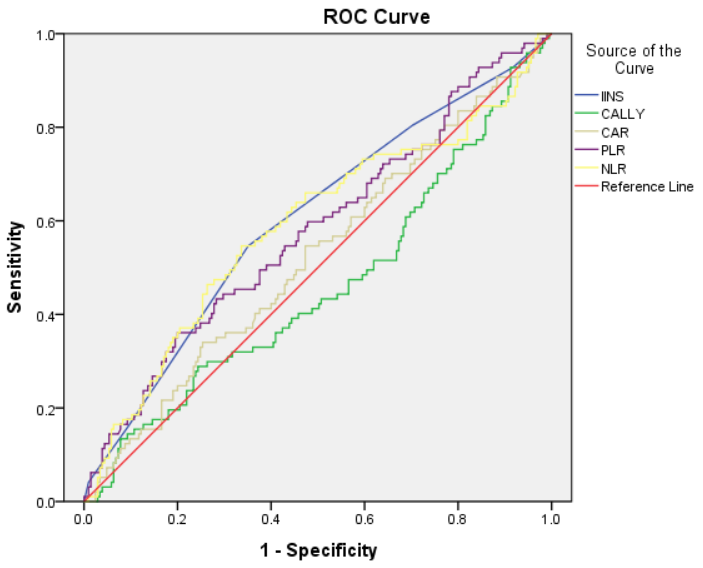

**Abbreviations:** ROC, receiver operating characteristic; CAR, CRP/ALB;PLR, PLT/LYM; NLR, NEU/LYM; IINS, inflammation-immunity-nutrition score; CALLY, high-sensitivity C-reactive protein-albumin-lymphocyte index.

**Supplemental Table.1** The AUC of CAR,PLR,NLR,IINS and CALLY for overall survival(OS) in the training cohort

| **Variable** | **Calculations** | **AUC (95% CI)** | **Specificity** | **Sensitivity** | ***p* value** |
| --- | --- | --- | --- | --- | --- |
| **IINS** |  | 0.602(0.533,0.672) | 0.165 | 0.098 | 0.004 |
| **CALLY** | ALB×LYM/(hsCRP×10) | 0.460(0.388,0.532) | 0.784 | 0.854 | 0.261 |
| **CAR** | CRP/ALB | 0.524(0.453,0.594) | 0.835 | 0.824 | 0.507 |
| **PLR** | PLT/LYM | 0.579(0.509,0.649) | 0.887 | 0.805 | 0.026 |
| **NLR** | NEU/LYM | 0.588(0.516,0.661) | 0.825 | 0.839 | 0.013 |

**Abbreviations:** IINS, inflammation-immunity-nutrition score; CALLY, high-sensitivity C-reactive protein-albumin-lymphocyte index; CAR, CRP/ALB; PLR, PLT/LYM; NLR, NEU/LYM.

**Supplemental Figure.2** Kaplan–Meier survival curve of IINS and CALLY in the training cohort and the validation cohort for overall survival(OS). (a) Kaplan–Meier curve of IINS for OS; (b) Kaplan–Meier curve of CALLY for OS.


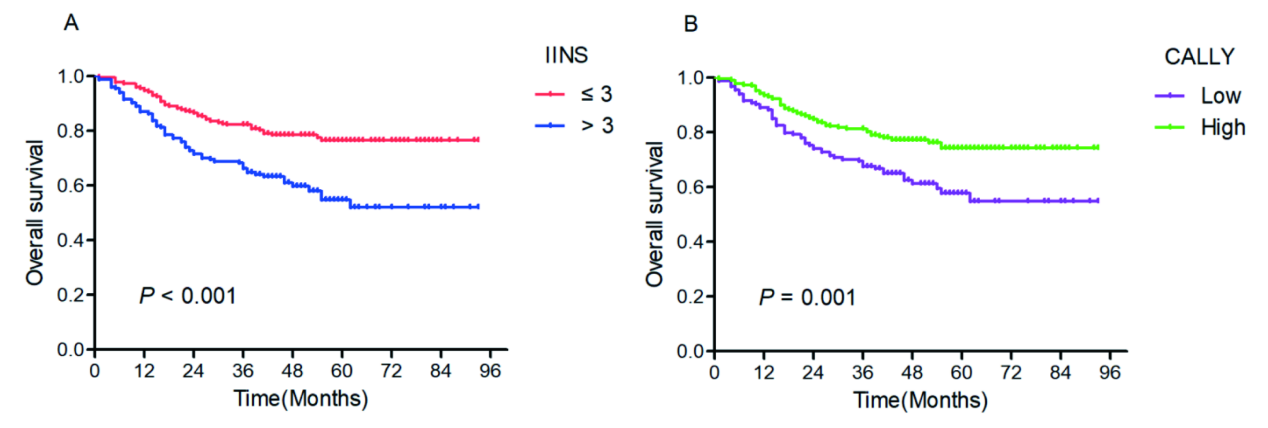


**Abbreviations:** IINS, inflammation-immunity-nutrition score; CALLY, high-sensitivity C-reactive protein-albumin-lymphocyte index.

**Supplemental Figure.3** Decision curve analysis (DCA) of models in the training cohort and the validation cohort for overall survival (OS). (A) Comparison of IINS and CALLY for predicting 1-year survival; (B) Comparison of IINS and CALLY for predicting 2-year survival; (C) Comparison of IINS and CALLY for predicting 3-year survival.


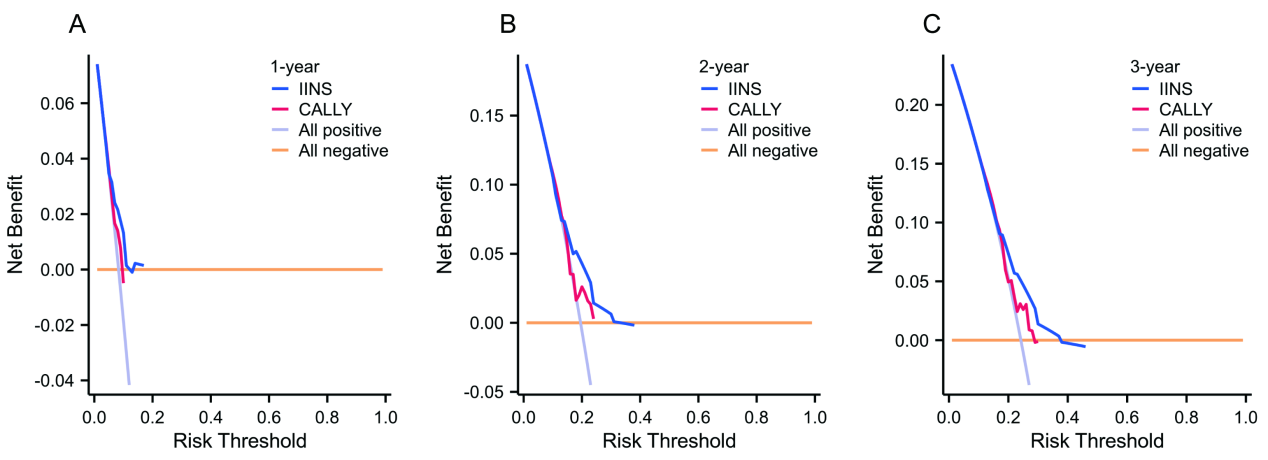


**Abbreviations:** IINS, inflammation-immunity-nutrition score; CALLY, high-sensitivity C-reactive protein-albumin-lymphocyte index.
